# Supplementary material
Source: PubMed Central journal article supplement (PMC2819642)

## Supplementary Figures

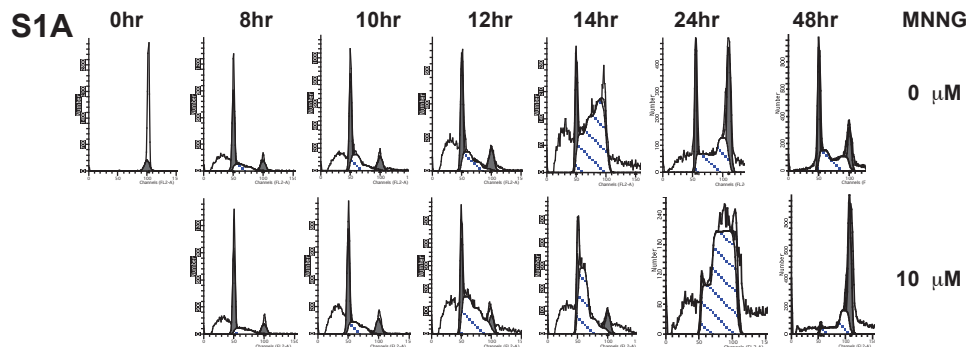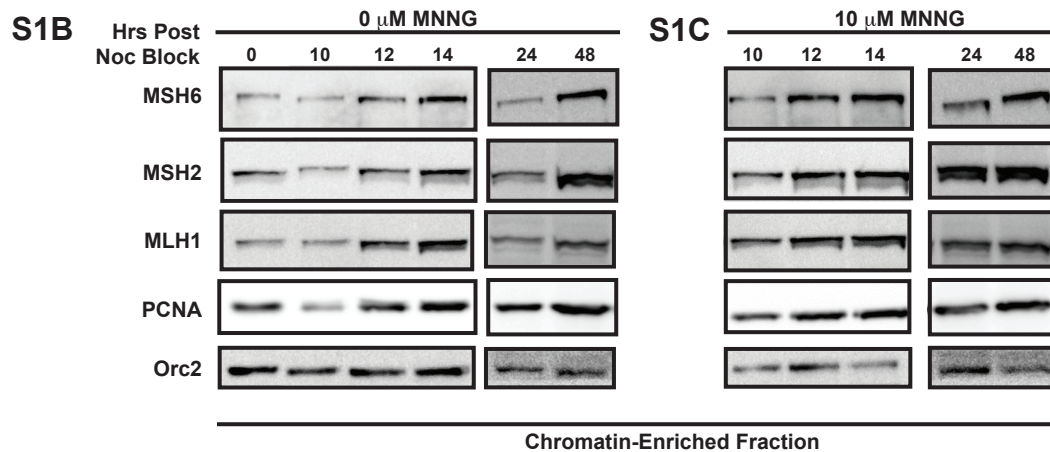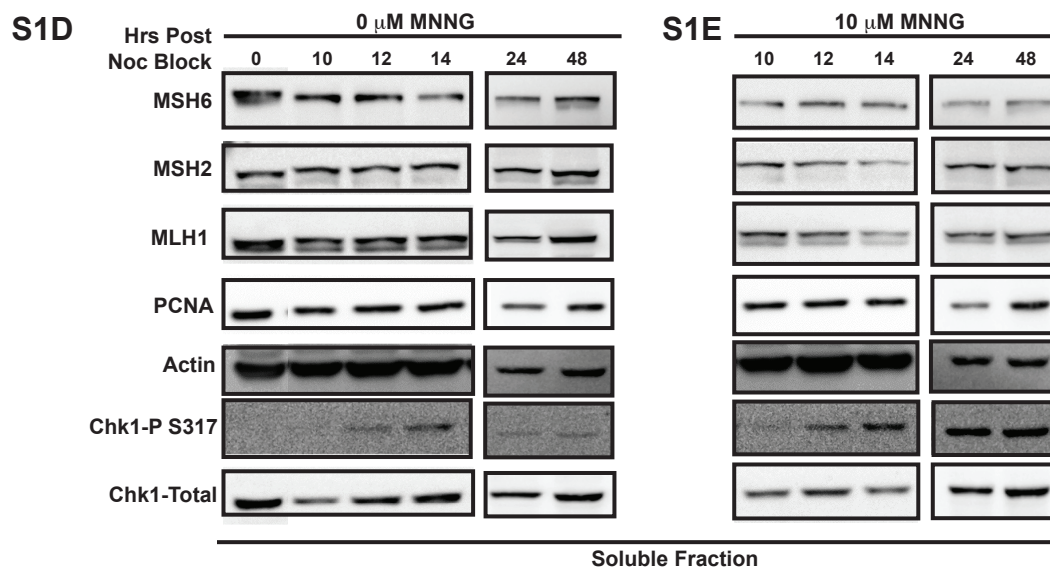

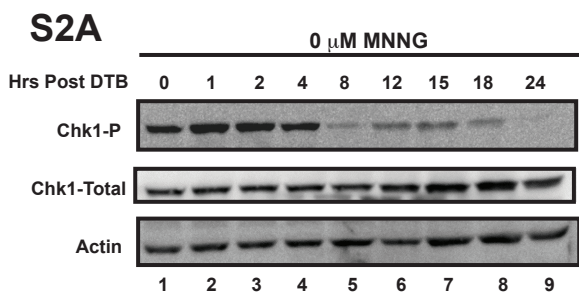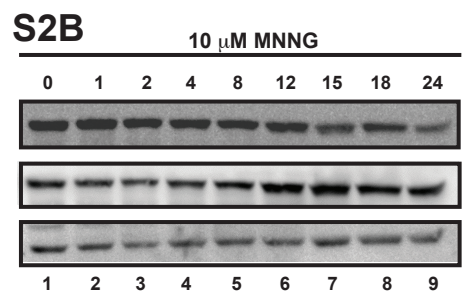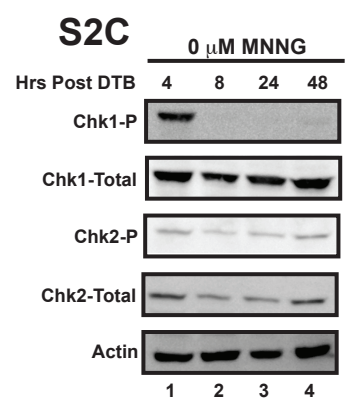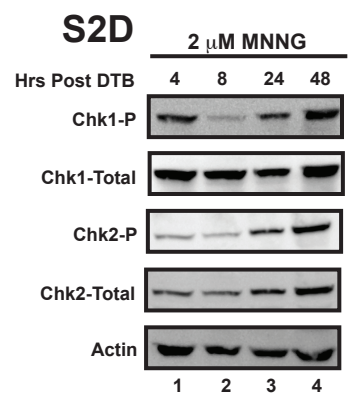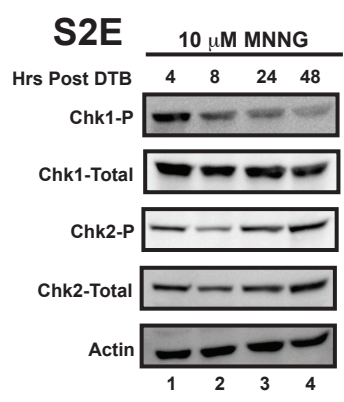

### S3A

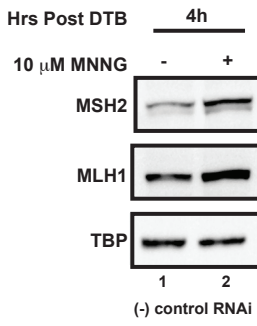

### S3B

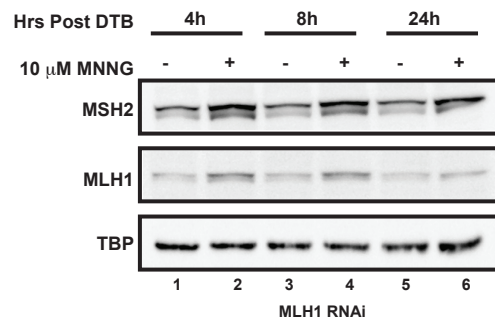

Supplement: NIHMS164858-supplement-01.pdf [file NIHMS164858-supplement-01.pdf]
